# Supplementary material for: Toward autonomous surface-based infrared remote sensing of polar clouds: Retrievals of cloud microphysical properties
Source: Copernicus journal article supplement (doi:10.5194/amt-2019-216), 2019-06-12
Supplement: Supplementary file 1 [file amt-2019-216-supplement.pdf]

### **S3. CLOUD and Atmospheric Radiation Retrieval Algorithm (CLARRA)**

#### **S3.1 Resolution and Model Errors**

Table S1 lists the spectral ranges for the microwindows used in this work. Microwindows were selected where contributions from strong lines was minimal, following Turner (2005).

Figures S1 – S6 show clear and cloud sky spectra and model errors in microwindows for resolutions of 0.1, 1, 2, 4, and 8  $\text{cm}^{-1}$ .

### **S5. Results and Discussion**

#### **S5.1 Retrieval overview**

The rationale for using the log of the effective radius and for setting the maximum effective radius to  $\sim 50 \mu\text{m}$  is demonstrated through Figure S7 for spherical liquid drops. The figure shows  $Q_{abs,liq}$  as a function of effective radius  $r_{liq}$  (note that the symbol names were simplified and that the x-axis is on a log scale) at several wavenumbers.  $Q_{abs,liq}$  reaches a maximum value at each wavenumber, as indicated with asterisks. At these wavenumbers and values of  $r_{liq}$ , the kernels are zero for and changes in  $r_{liq}$  have a negligible effect on  $\tau_a$ ; thus the retrieval lacks sensitivity to  $r_{liq}$  at the given wavenumber. The value of  $Q_{abs,liq}$  for which kernels are  $\leq 0$  is indicated with a dashed vertical line; this represents a likely limit on the value of  $r_{liq}$  that can be retrieved.

The change in radiance with a change in  $r_{liq}$  in turn depends on the change in  $Q_{abs}$  with a change in  $r_{liq}$ . However,  $dQ_{abs,liq} / dr_{liq}$  is not linear, as shown in Fig S7b. Instead,  $Q_{abs,liq} / dr_{liq}$  decreases as  $r_{liq}$  increases. This nonlinearity causes the inverse retrieval to overestimate the step size when  $r_{liq}$  is small, resulting in potentially overstepping the solution, and underestimating the step size when  $r_{liq}$  is large, resulting in decreased sensitivity (and increased likelihood of getting “stuck” at a large value of  $r_{liq}$ ). The kernels can be made more linear by modifying the kernel to  $dQ_{abs,liq} / d(\log r_{liq})$ , shown in Fig. S7c.

#### **S5.4 Cloud vertical inhomogeneity and Ice habit**

Table S2 gives retrieval errors for combinations of imposed errors c: noise of 0.2  $\text{mW}/(\text{m}^2 \text{sr cm}^{-1})$ , radiation bias of 0.15  $\text{mW}/(\text{m}^2 \text{sr cm}^{-1})$ , and water vapor bias of 3%, with retrieved cloud heights. Overall, errors are smallest for inhomogeneous clouds and largest for dense and liquid topped clouds.

Table S1. Microwindows used in the microphysical cloud property retrieval. The top row gives the resolutions of the spectra while following rows give the spectral ranges ( $\nu_1 - \nu_2$ ) of the microwindows used for those resolutions.

| 0.1 – 4 cm <sup>-1</sup> |         | 8 cm <sup>-1</sup> |         |
|--------------------------|---------|--------------------|---------|
| $\nu_1$                  | $\nu_2$ | $\nu_1$            | $\nu_2$ |
| 494.9                    | 499.0   | 495                | 499     |
| 530.0                    | 533.7   | 530                | 538     |
| 558.0                    | 562.0   | 558                | 562     |
| 770.9                    | 774.8   | 771                | 780     |
| 785.9                    | 790.7   | 785                | 793     |
| 809.5                    | 813.5   | 810                | 819     |
| 817.0                    | 823.5   | 817                | 827     |
| 828.6                    | 834.6   | 829                | 838     |
| 843.1                    | 848.1   | 843                | 853     |
| 860.1                    | 864.0   | 860                | 870     |
| 872.5                    | 877.5   | 872                | 883     |
| 891.9                    | 895.8   | 890                | 898     |
| 898.2                    | 904.8   | 898                | 908     |
| 929.6                    | 939.7   | 929                | 939     |
| 958.0                    | 964.3   | 958                | 966     |
| 985.0                    | 991.5   | 985                | 993     |
| 1076.6                   | 1084.8  | 1076               | 1083    |
| 1092.2                   | 1098.1  | 1092               | 1100    |
| 1113.6                   | 1116.6  | 1113               | 1120    |
| 1124.4                   | 1132.6  | 1124               | 1131    |
| 1142.2                   | 1148.0  | 1142               | 1150    |
| 1155.2                   | 1163.4  | 1155               | 1162    |

Table S2. Errors in retrieved cloud microphysical properties for macroscopically varying clouds at a resolution of  $0.5 \text{ cm}^{-1}$  (where COD refers to cloud optical depth in the geometric limit,  $r_{liq}$  and  $r_{ice}$  are the effective radii of liquid and ice, and SD indicates standard deviation). For the upper set of cases, the following errors were imposed: noise of  $0.2 \text{ mW}/(\text{m}^2 \text{ sr cm}^{-1})$ , radiation bias of  $0.15 \text{ mW}/(\text{m}^2 \text{ sr cm}^{-1})$ , and water vapor bias of 3%; retrieved cloud heights were used.

| Cloud type    | Error | COD  |      | Ice fraction |      | $r_{liq}$ ( $\mu\text{m}$ ) |     | $r_{ice}$ ( $\mu\text{m}$ ) |    |
|---------------|-------|------|------|--------------|------|-----------------------------|-----|-----------------------------|----|
|               |       | Mean | SD   | Mean         | SD   | Mean                        | SD  | Mean                        | SD |
| Dense         | y     | 0.04 | 0.09 | -0.07        | 0.12 | 0.1                         | 1.9 | 5                           | 9  |
| Diffuse       | y     | 0.06 | 0.08 | -0.02        | 0.06 | 0.1                         | 1.1 | 3                           | 7  |
| Inhomogeneous | y     | 0.03 | 0.08 | -0.02        | 0.04 | 0.1                         | 1.3 | 3                           | 6  |
| Liquid topped | y     | 0.07 | 0.09 | -0.01        | 0.07 | -0.3                        | 1.6 | 6                           | 8  |

Table S3. Errors cloud microphysical properties retrieved assuming a spherical ice habit, for ice clouds of varying habit (first column). COD refers to cloud optical depth in the geometric limit,  $r_{ice}$  is the effective radius of ice, and SD indicates standard deviation. The upper set of cases includes no other imposed errors and uses true cloud heights. The lower set of cases includes noise of  $0.2 \text{ mW}/(\text{m}^2 \text{ sr cm}^{-1})$ , radiation bias of  $0.15 \text{ mW}/(\text{m}^2 \text{ sr cm}^{-1})$ , and water vapor bias of -3%, and uses retrieved cloud heights. The final column shows the number of cases omitted due to having rms differences of greater than 1 RU between the measured and retrieved radiance.

| Habit                 | Error | COD   |       | Ice fraction |      | $r_{liq}$ ( $\mu\text{m}$ ) |     | Omit |
|-----------------------|-------|-------|-------|--------------|------|-----------------------------|-----|------|
|                       |       | Mean  | SD    | Mean         | SD   | Mean                        | SD  |      |
| Sphere                | n     | 0.008 | 0.019 | 0.00         | 0.01 | -0.5                        | 0.6 | 0    |
| Hollow bullet rosette | n     | 0.6   | 0.4   | 0.05         | 0.07 | -5                          | 0.8 | 2    |
| Smooth solid column   | n     | 0.3   | 0.2   | 0.02         | 0.03 | 0                           | 2   | 0    |
| Rough solid column    | n     | 0.3   | 0.2   | 0.02         | 0.03 | -1                          | 2   | 0    |
| Smooth plate          | n     | 0.5   | 0.3   | 0.00         | 0.06 | -6                          | 1.2 | 4    |
| Rough plate           | n     | 0.5   | 0.3   | 0.06         | 0.06 | -5                          | 1.5 | 2    |
| Sphere                | y     | -0.01 | 0.06  | 0.06         | 0.15 | -2                          | 2   | 0    |
| Hollow bullet rosette | y     | 0.6   | 0.4   | 0.11         | 0.14 | -4                          | 1   | 3    |
| Smooth solid column   | y     | 0.3   | 0.15  | 0.09         | 0.08 | -2                          | 1   | 0    |
| Rough solid column    | y     | 0.3   | 0.10  | 0.09         | 0.10 | -1                          | 3   | 0    |
| Smooth plate          | y     | 0.5   | 0.3   | 0.00         | 0.09 | -4                          | 1   | 4    |
| Rough plate           | y     | 0.6   | 0.3   | 0.11         | 0.13 | -5                          | 2   | 3    |

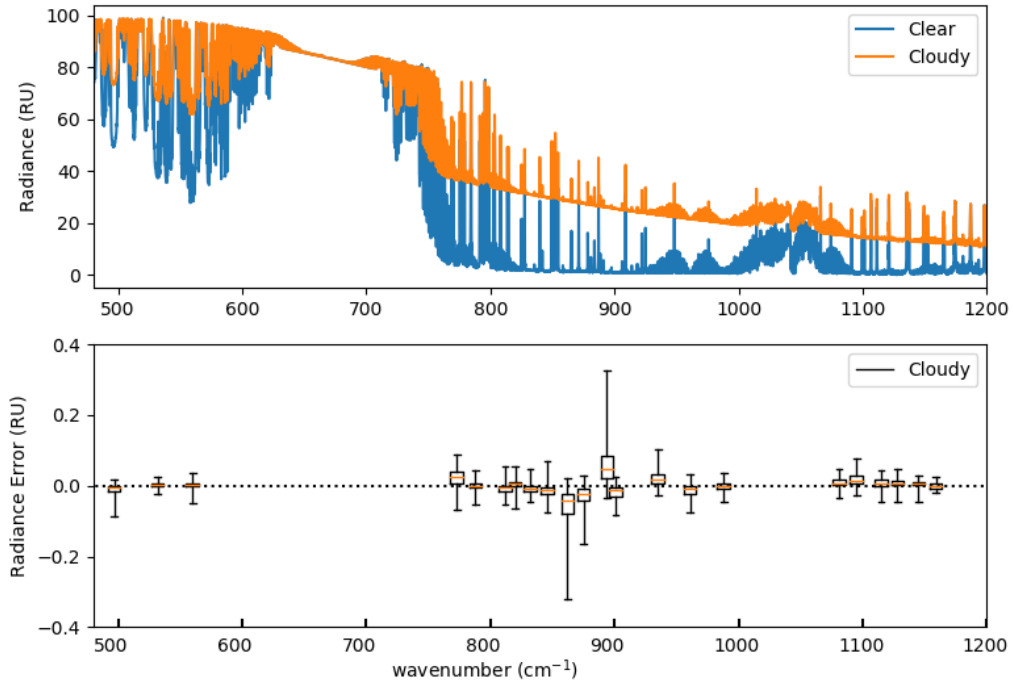

Figure S1. Clear and cloud-sky downwelling radiance ( $1 \text{ RU} = \text{mW} / [\text{m}^2 \text{ sr cm}^{-1}]$ ) for typical polar atmosphere at a resolution of  $0.1 \text{ cm}^{-1}$  (top). Box and whiskers plots of model errors (model – true) for all radiances, averaged in microwindows (bottom; horizontal lines give the median, boxes give the 1<sup>st</sup> and 3<sup>rd</sup> quartiles, and whiskers give the range).

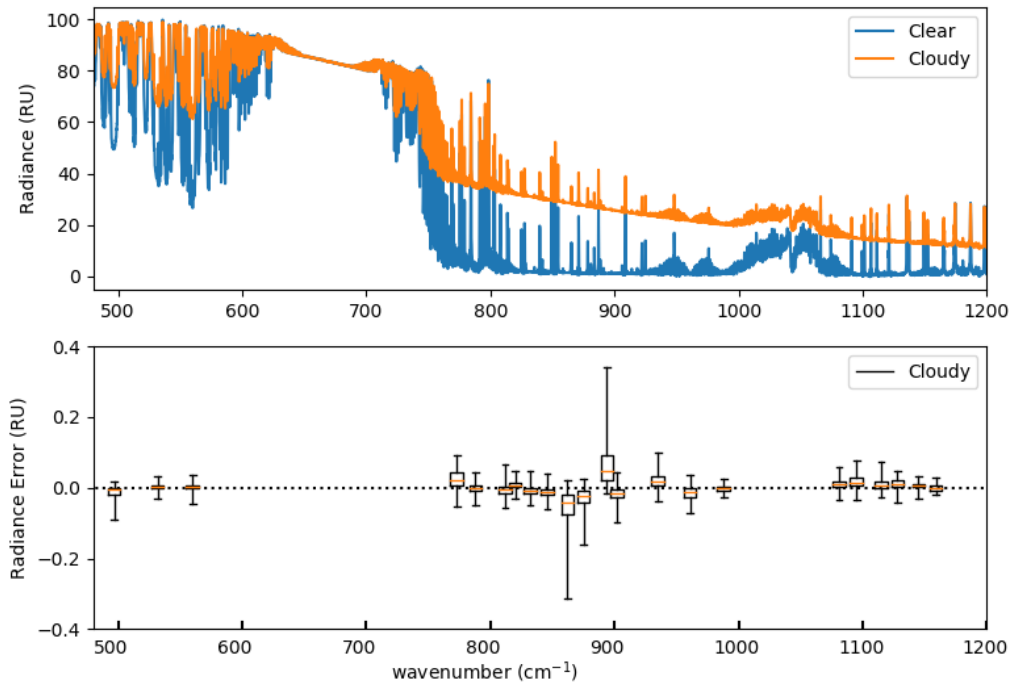

Figure S2. Clear and cloud-sky downwelling radiance ( $1 \text{ RU} = \text{mW} / [\text{m}^2 \text{ sr cm}^{-1}]$ ) for typical polar atmosphere at a resolution of  $0.2 \text{ cm}^{-1}$  (top). Box and whiskers plots of model errors (model – true) for all radiances, averaged in microwindows (bottom; horizontal lines give the median, boxes give the 1<sup>st</sup> and 3<sup>rd</sup> quartiles, and whiskers give the range).

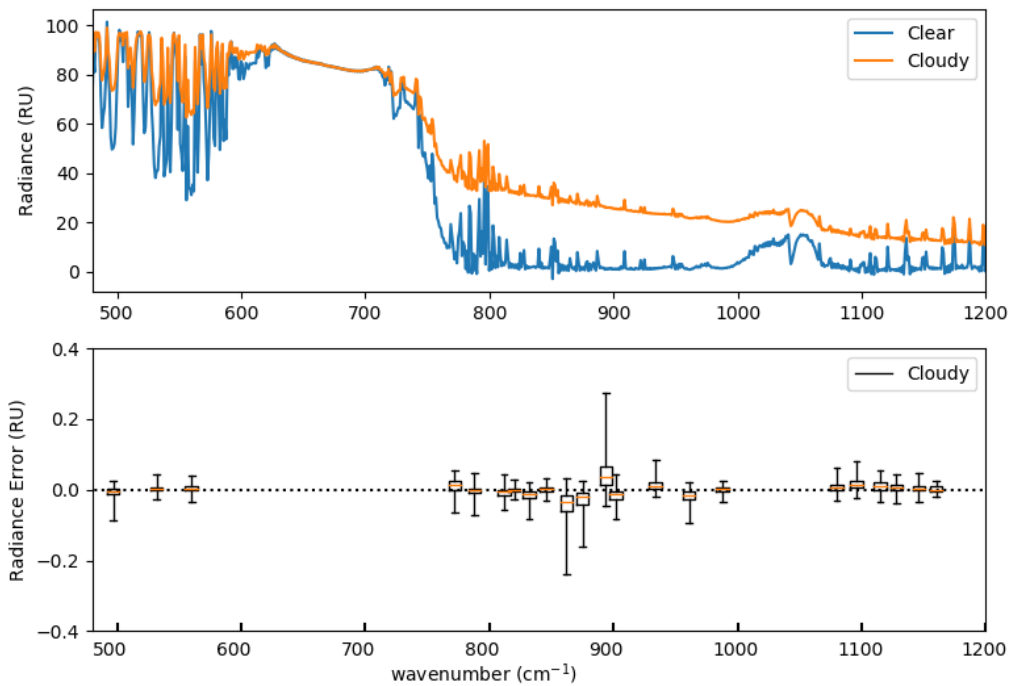

Figure S3. Clear and cloud-sky downwelling radiance ( $1 \text{ RU} = \text{mW} / [\text{m}^2 \text{ sr cm}^{-1}]$ ) for typical polar atmosphere at a resolution of  $1.0 \text{ cm}^{-1}$  (top). Box and whiskers plots of model errors for all radiances, averaged in microwindows (bottom; horizontal lines give the median, boxes give the 1<sup>st</sup> and 3<sup>rd</sup> quartiles, and whiskers give the range).

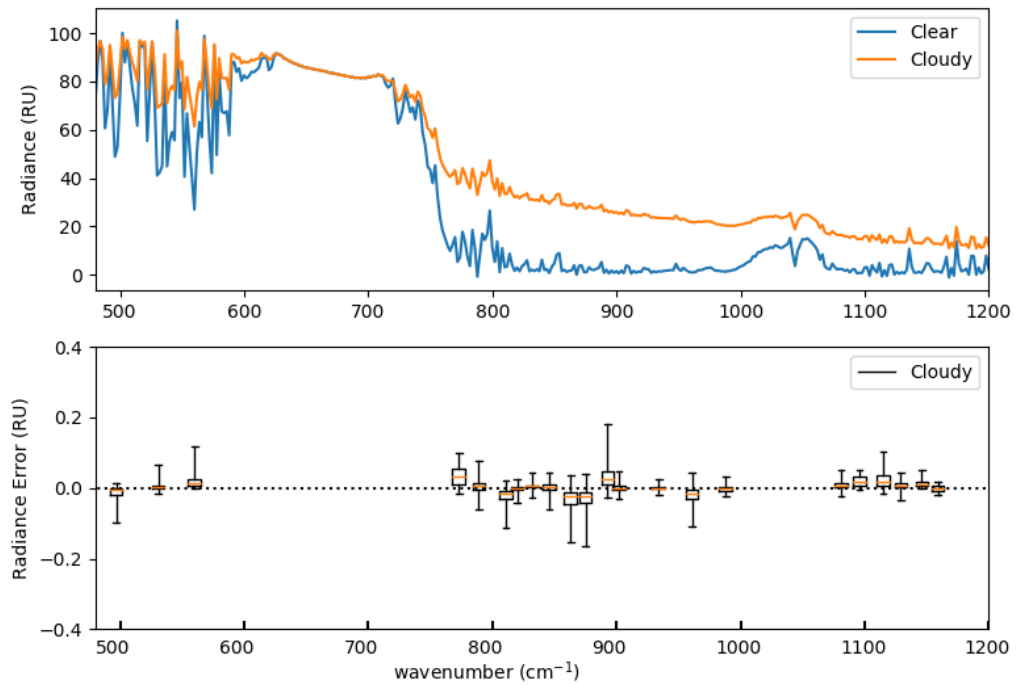

Figure S4. Clear and cloud-sky downwelling radiance ( $1 \text{ RU} = \text{mW} / [\text{m}^2 \text{ sr cm}^{-1}]$ ) for typical polar atmosphere at a resolution of  $2.0 \text{ cm}^{-1}$  (top). Box and whiskers plots of model errors for all radiances, averaged in microwindows (bottom; horizontal lines give the median, boxes give the 1<sup>st</sup> and 3<sup>rd</sup> quartiles, and whiskers give the range).

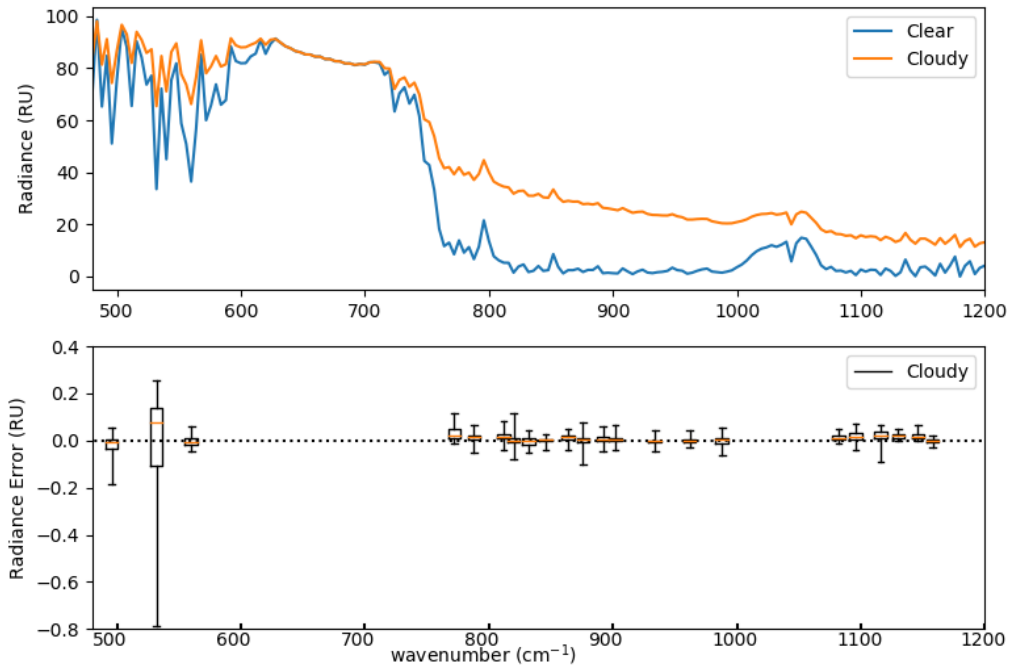

Figure S5. Clear and cloud-sky downwelling radiance ( $1 \text{ RU} = \text{mW} / [\text{m}^2 \text{ sr cm}^{-1}]$ ) for typical polar atmosphere at a resolution of  $4.0 \text{ cm}^{-1}$  (top). Box and whiskers plots of model errors for all radiances, averaged in microwindows (bottom; horizontal lines give the median, boxes give the 1<sup>st</sup> and 3<sup>rd</sup> quartiles, and whiskers give the range).



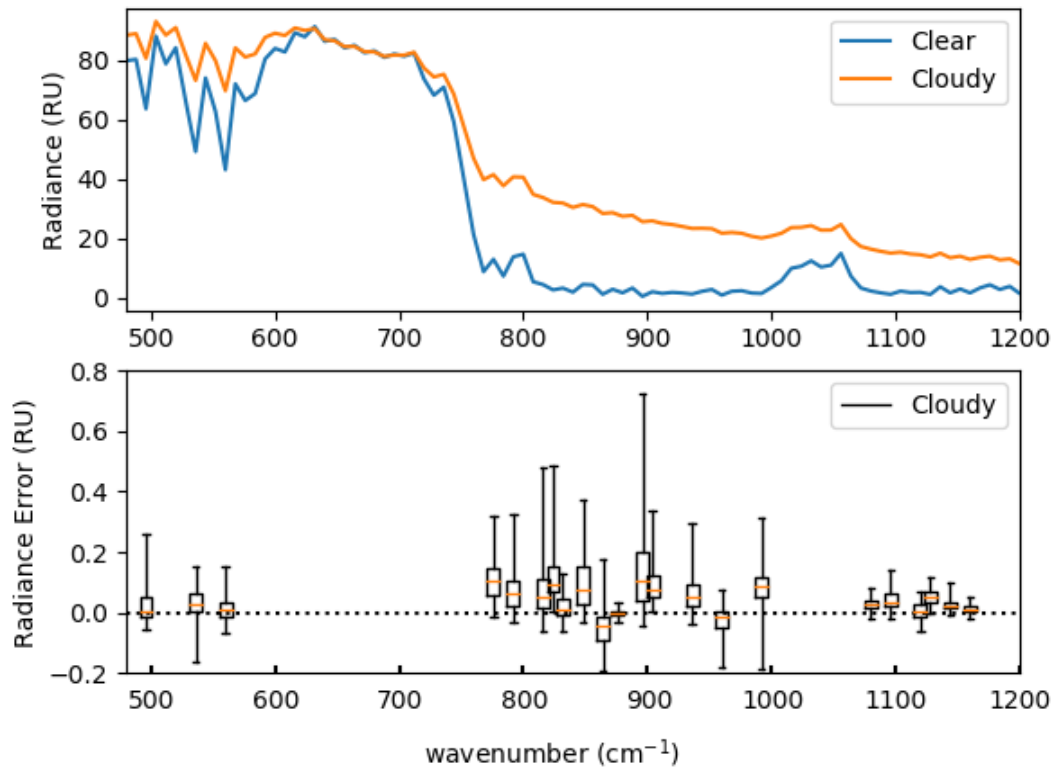

Figure S6. Clear and cloud-sky downwelling radiance ( $1 \text{ RU} = \text{mW} / [\text{m}^2 \text{ sr cm}^{-1}]$ ) for typical polar atmosphere at a resolution of  $8.0 \text{ cm}^{-1}$  (top). Box and whiskers plots of model errors for all radiances, averaged in microwindows (bottom; horizontal lines give the median, boxes give the 1<sup>st</sup> and 3<sup>rd</sup> quartiles, and whiskers give the range).

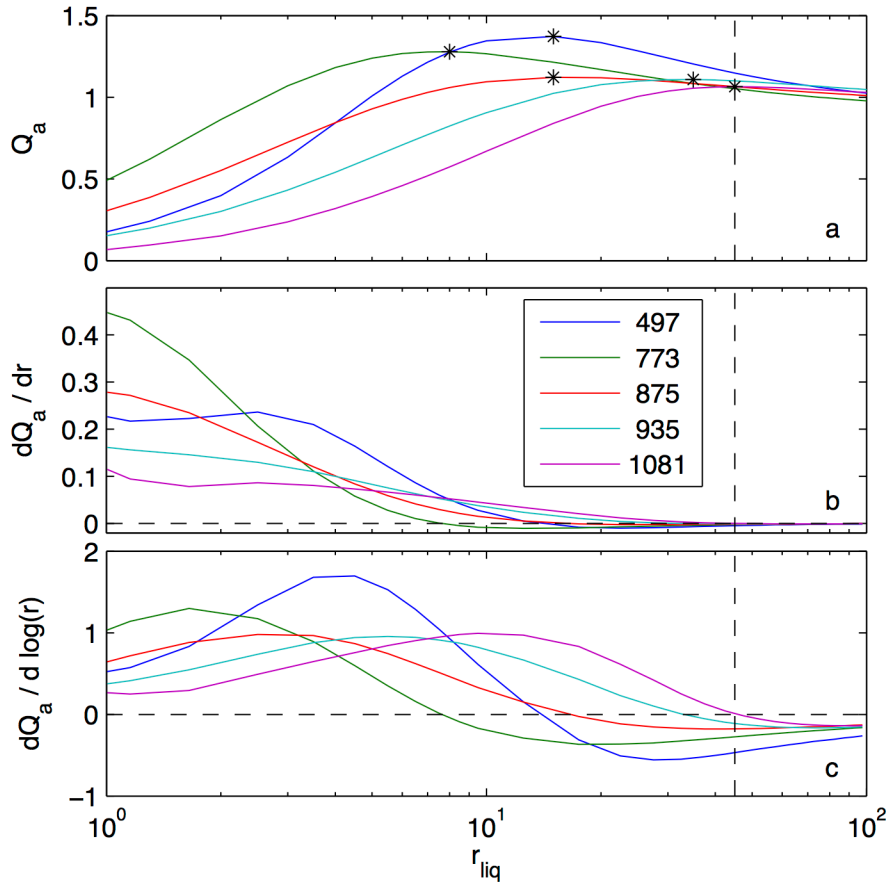

Figure S7. a) Absorption efficiency,  $Q_a$ , for spherical liquid water drops as a function of effective radius,  $r_{liq}$ . b) Change in  $Q_a$  with a change in effective radius of liquid. c) Change in  $Q_a$  with a change in log of the effective radius.
